# Supplementary material for: Development of a novel immunocompetent murine tumor model for urothelial carcinoma using in vivo electroporation
Source: PubMed Central journal article supplement (PMC11514157; doi:10.1038/s41598-024-77178-z), 2024-10-27
Supplement: 41598_2024_77178_MOESM1_ESM.pdf [file 41598_2024_77178_MOESM1_ESM.pdf]

## **SUPPLEMENTARY MATERIAL**

### **Development of a novel immunocompetent murine tumor model for urothelial carcinoma using in vivo electroporation**

**Stefan Soleder, Nicolas Gengenbacher, Carolin Mogler, Markus Eckstein,  
Anja Runge, Maximilian C. Kriegmair, Hellmut G. Augustin**

## Supplementary Material

### Supplementary figure 1

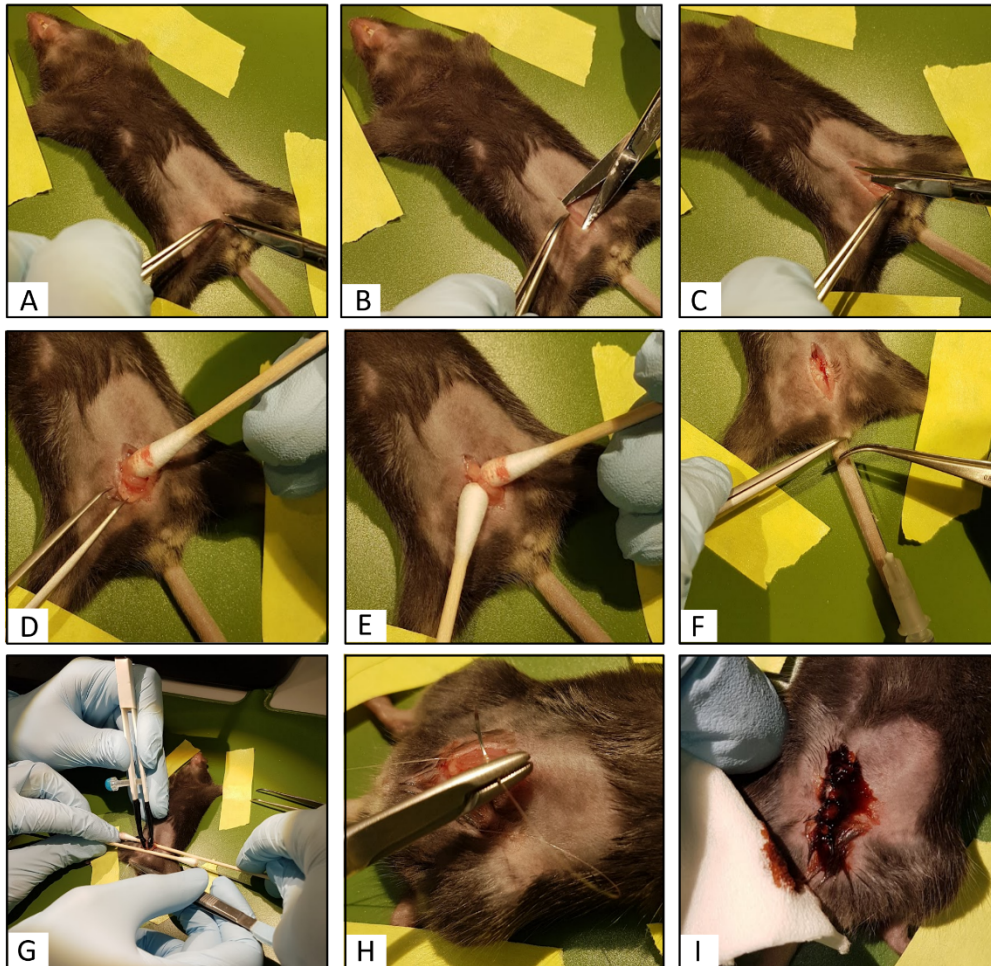

**Suppl. Fig. 1: Complete surgical procedure, catheterization and electroporation.** A-C show skin incision, mobilization of peritoneum from the skin and peritoneal incision, D-E show mobilization of the bladder with tweezers and a cotton swab, squeezing to empty urine and repositioning, F shows catheterization with attached syringe containing plasmids (male bladders injected with a needle), G shows electroporation carried out by two experimenters, one stabilizing the filled bladder and one operating electrodes and electroporator, H-I show suturing of peritoneum and skin and application of iodine solution

### Supplementary figure 2

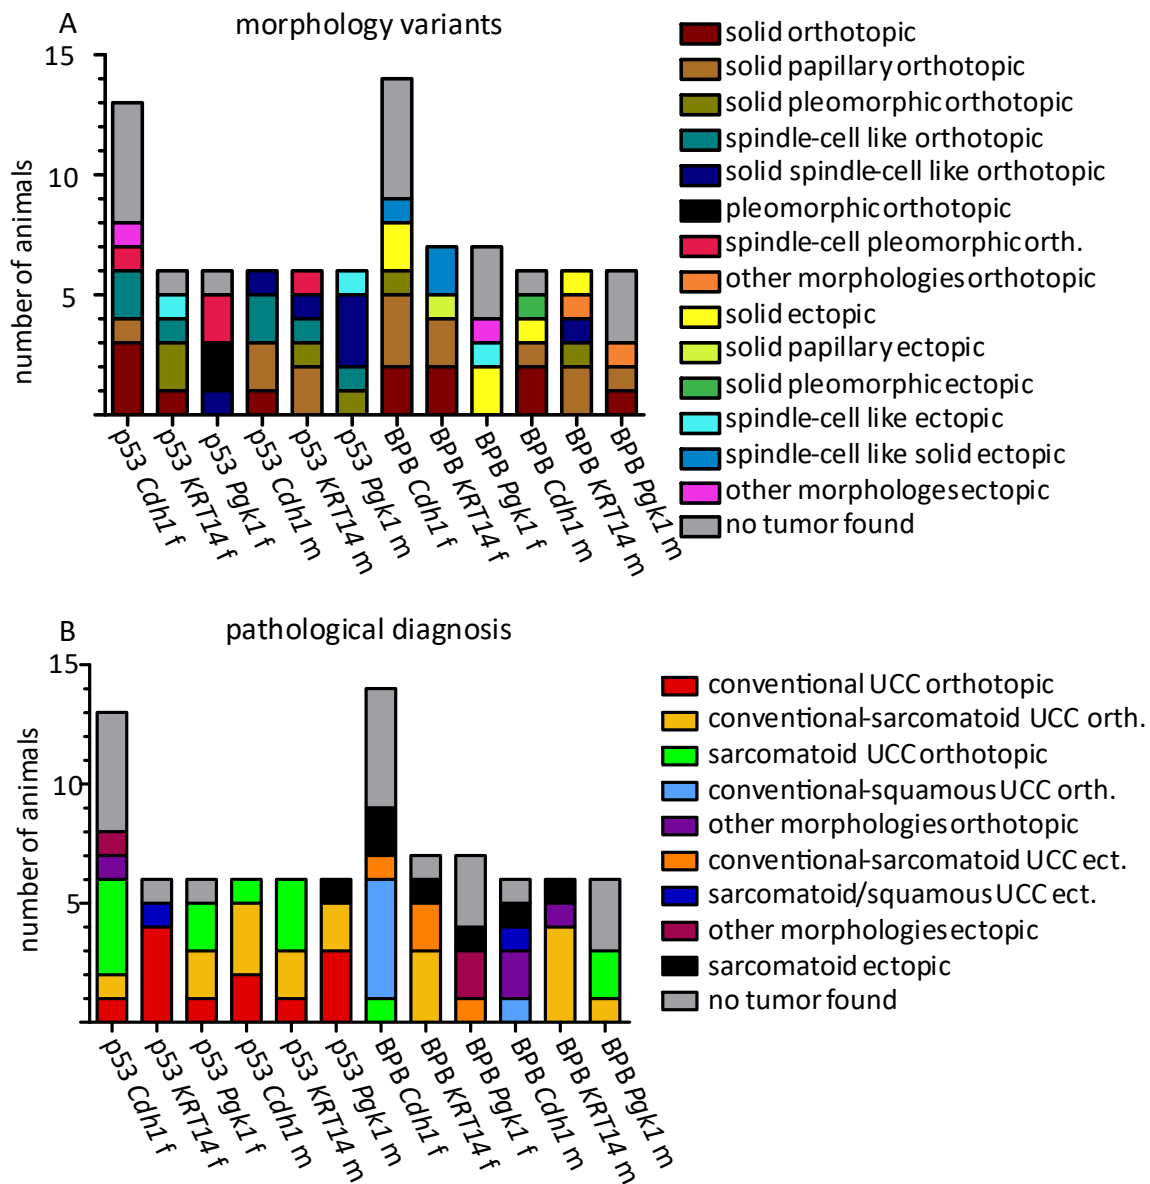

**Suppl. Fig. 2: Histopathological diagnosis and morphological patterns show different variants of mostly urothelial cell carcinomas. A shows a detailed morphological analysis of the primary and secondary growth patterns of the resulting tumors; B shows the resulting diagnosis based on HE- and IHC-stainings.**

## Supplementary Figure 3

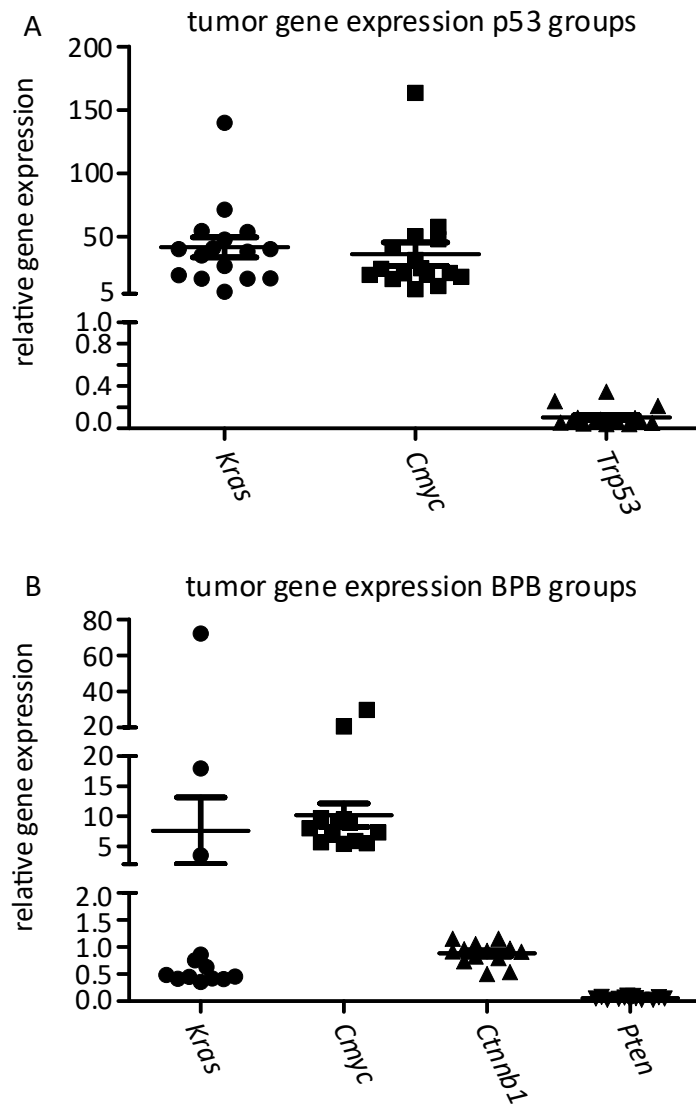

**Suppl. Fig. 3: Relative gene expression of inserted or knocked-out genes.** A shows overexpression of *Kras* and *Cmyc* and knockout of *Trp53* in the p53 background tumors; B shows normal levels of *Ctnnb1* (mutation caused by Cre is removal of exon 3, not knock-out) and knockout of *Pten*, overexpression of *Cmyc*, varying levels of gene expression of *Kras* in the BPB background tumors .

## Supplementary Table 1

**Supplementary Table 1:** High rates of orthotopic urothelial cell carcinomas in most groups, rapid tumor development and high rates of metastasis across all tumors.

| experimental group                                                                          | n  | median time to detection, any kind of tumor                    |                                                                                      | % of mice with any kind of tumor | median time to sacrifice, mice without tumor | % of mice with ortho-topic UCC tumor (success) | % of orthotopic UCC with metastasis | % of orthotopic UCC with muscle invasiveness |
|---------------------------------------------------------------------------------------------|----|----------------------------------------------------------------|--------------------------------------------------------------------------------------|----------------------------------|----------------------------------------------|------------------------------------------------|-------------------------------------|----------------------------------------------|
|                                                                                             |    | first cohort, no differentiation by sex (all direct injection) | second cohort, sexes with differing treatment protocol (catheterization for females) |                                  |                                              |                                                |                                     |                                              |
| p53 <i>Pgk1-Cre</i>                                                                         | 6  | no tumors                                                      | no tumors                                                                            | 0 %                              | 300 d                                        | 0%                                             | -                                   | -                                            |
| p53 <i>Pgk1-Cre + Kras</i>                                                                  | 5  | 44 d                                                           | 40 d                                                                                 | 100 %                            | -                                            | 80 %                                           | 50 %                                | 50 % (-75 %)                                 |
| p53 <i>Pgk1-Cre + Cmyc</i>                                                                  | 5  | 83 d                                                           | 83 d                                                                                 | 80 %                             | 44 d                                         | 40 %                                           | 100 %                               | 50 % (-100 %)                                |
| p53 <i>Pgk1-Cre + Kras + Cmyc</i>                                                           | 6* | 29 d                                                           | 29 d                                                                                 | 83.3 %                           | After OP                                     | 83.3 %                                         | 20 %                                | 40 % (-80 %)                                 |
| BPB <i>Pgk1-Cre</i>                                                                         | 8  | 51 d                                                           | 51 d                                                                                 | 62.5 %                           | 280,5 d                                      | 62.5 %                                         | 60 %                                | 60 % (-100 %)                                |
| BPB <i>Pgk1-Cre + Kras</i>                                                                  | 6  | 69 d                                                           | 69 d                                                                                 | 100 %                            | -                                            | 66,7 %                                         | 25 %                                | 25 % (-100 %)                                |
| BPB <i>Pgk1-Cre + Cmyc</i>                                                                  | 6  | 43 d                                                           | 44 d                                                                                 | 100 %                            | -                                            | 83,3 %                                         | 80 %                                | 20 % (-100 %)                                |
| BPB <i>Pgk1-Cre + Kras + Cmyc</i>                                                           | 6  | 55 d                                                           | 59 d                                                                                 | 83,3 %                           | 59 d                                         | 16,6 %                                         | 0 %                                 | 0 % (-100 %)                                 |
| <i>* 1 mouse euthanized right after OP</i>                                                  |    |                                                                |                                                                                      |                                  |                                              |                                                |                                     |                                              |
| <b>second cohort, sexes with differing treatment protocol (catheterization for females)</b> |    |                                                                |                                                                                      |                                  |                                              |                                                |                                     |                                              |
| p53 female (catheterization )                                                               |    |                                                                |                                                                                      |                                  |                                              |                                                |                                     |                                              |
| p53 <i>Cdh1-Cre/SB13 + Kras + Cmyc</i>                                                      | 13 | 26 d                                                           | 26 d                                                                                 | 61,5 %                           | 50 d                                         | 53,8 %                                         | 71,4 %                              | 71,4 % (-85,7 %)                             |
| p53 <i>KRT14-Cre/SB13 + Kras + Cmyc</i>                                                     | 6  | 26 d                                                           | 26 d                                                                                 | 83,3 %                           | 29 d                                         | 66,7 %                                         | 50 %                                | 75 %                                         |
| p53 <i>Pgk1-Cre/SB13 + Kras + Cmyc</i>                                                      | 6  | 25 d                                                           | 25 d                                                                                 | 83,3 %                           | 35 d                                         | 83,3 %                                         | 20 %                                | 60 % (-100 %)                                |
| p53 male (direct injection)                                                                 |    |                                                                |                                                                                      |                                  |                                              |                                                |                                     |                                              |
| p53 <i>Cdh1-Cre/SB13 + Kras + Cmyc</i>                                                      | 6  | 22,5 d                                                         | 22,5 d                                                                               | 100 %                            | -                                            | 100 %                                          | 66,7 %                              | 80 % (-100 %)                                |
| p53 <i>KRT14-Cre/SB13 + Kras + Cmyc</i>                                                     | 6  | 23 d                                                           | 23 d                                                                                 | 100 %                            | -                                            | 100 %                                          | 83,3 %                              | 100 %                                        |
| p53 <i>Pgk1-Cre/SB13 + Kras + Cmyc</i>                                                      | 6  | 20 d                                                           | 20 d                                                                                 | 100 %                            | -                                            | 83,3 %                                         | 40 %                                | 80 % (-100 %)                                |
| BPB female (catheterization )                                                               |    |                                                                |                                                                                      |                                  |                                              |                                                |                                     |                                              |
| BPB <i>Cdh1-Cre/SB13 + Kras + Cmyc</i>                                                      | 14 | 35 d                                                           | 30 d                                                                                 | 64,3 %                           | 57 d                                         | 42,9 %                                         | 100 %                               | 80 %                                         |
| BPB <i>KRT14-Cre/SB13 + Kras + Cmyc</i>                                                     | 7  | 37,5 d                                                         | 42 d                                                                                 | 85,7 %                           | 48 d                                         | 42,9 %                                         | 66,7 %                              | 66,7 %                                       |
| BPB <i>Pgk1-Cre/SB13 + Kras + Cmyc</i>                                                      | 7  | 23,5 d                                                         | -                                                                                    | 57,1 %                           | 29 d                                         | 0 %                                            | -                                   | -                                            |
| BPB male (direct injection)                                                                 |    |                                                                |                                                                                      |                                  |                                              |                                                |                                     |                                              |
| BPB <i>Cdh1-Cre/SB13 + Kras + Cmyc</i>                                                      | 6  | 30 d                                                           | 48 d                                                                                 | 83,3 %                           | 63 d                                         | 16,7 %                                         | 100 %                               | 100 %                                        |
| BPB <i>KRT14-Cre/SB13 + Kras + Cmyc</i>                                                     | 6  | 30 d                                                           | 30 d                                                                                 | 100 %                            | -                                            | 66,7 %                                         | 100 %                               | 100 %                                        |
| BPB <i>Pgk1-Cre/SB13 + Kras + Cmyc</i>                                                      | 6  | 30 d                                                           | 30 d                                                                                 | 50 %                             | 30 d                                         | 50 %                                           | 33 %                                | 66,7 % (-100 %)                              |
| <i>2 mice euthanized right after OP</i>                                                     |    |                                                                |                                                                                      |                                  |                                              |                                                |                                     |                                              |

**Supplementary Table 2****Supplementary Table 2:** Mouse strain verification RT-qPCR primers used.

| Genotype                                                | Primer                                                                                                   | Sequence (5'-3')                                                                                                                                                                 |
|---------------------------------------------------------|----------------------------------------------------------------------------------------------------------|----------------------------------------------------------------------------------------------------------------------------------------------------------------------------------|
| Rainbow2 x p53flox                                      | Rainbow2 for<br>Rainbow2 rev<br>p53 floxed for<br>p53 floxed rev                                         | GGCACGCTGATCTACAAGGT<br>GGGAGGTGTGGGAGGTTTT<br>CACAAAAACAGGTTAAACCCA<br>AGCACATAGGAGGCAGAGAC                                                                                     |
| Braf <sup>LSL-V600E</sup> x PTEN-<br>lox x Bcat-ex3-lox | Braf CA for<br>Braf CA rev<br>Pten for<br>Pten rev<br>Pten CPRB<br>Bcat-Intr2 Fwd-F<br>Bcat-Intr2 R175-R | TGAGTATTTTTGTGGCAACTGC<br>CTCTGCTGGGAAAGCGGC<br>TGTCTGGCAATGCTGTAGTAATA<br>AAGATAATCCCAGTGTAAAGAAA<br>GCATACATTATACGAAGTTATGGC<br>GATGCCTGTCTGAGGATCTGC<br>CAGGTGAGGGTCAGTATGAGC |
